# Supplementary material for: Cancer-Associated Substitutions in RNA Recognition Motifs of PUF60 and U2AF65 Reveal Residues Required for Correct Folding and 3′ Splice-Site Selection
Source: PubMed Central journal article supplement (PMC7408900; doi:10.3390/cancers12071865), 2020-07-11
Supplement: cancers-12-01865-s001.pdf [file cancers-12-01865-s001.pdf]

## SUPPLEMENTAL INFORMATION

### **Cancer-associated substitutions in RNA recognition motifs of PUF60 and U2AF65 reveal residues required for correct folding and 3' splice site selection**

Jana Kralovicova<sup>1,2</sup>, Ivana Borovska<sup>2</sup>, Monika Kubickova<sup>3</sup>, Peter J. Lukavsky<sup>3</sup>, Igor Vorechovsky<sup>1</sup>

<sup>1</sup>University of Southampton  
Faculty of Medicine  
Southampton SO16 6YD  
United Kingdom

<sup>2</sup>Slovak Academy of Sciences  
Institute of Molecular Physiology and Genetics  
840 05 Bratislava  
Slovak Republic

<sup>3</sup>Masaryk University  
CEITEC  
625 00 Brno  
Czech Republic

**Table S1 Characterization of tested mutations**

| COSMIC mutation              | Mutagenic primer <sup>1</sup> | Amino acid substitution | Domain | Secondary structure <sup>2</sup> | FATHHM score <sup>3</sup> | Malignancy <sup>3</sup>   | Source <sup>3</sup> | Method <sup>3</sup> |
|------------------------------|-------------------------------|-------------------------|--------|----------------------------------|---------------------------|---------------------------|---------------------|---------------------|
| PUF60-419T>C                 | CTACTATGAGCcGGGGGAGGACA       | L140P                   | RRM1   | not assigned                     | 0.96                      | Colorectal cancer         | (1)                 | WES                 |
| PUF60-437G>A                 | GGACACCATCCaCCAGGCCTTTG       | R146H                   | RRM1   | $\alpha$ helix                   | 0.96                      | Breast cancer             | (2)                 | WGS                 |
| PUF60-436C>T                 | AGGACACCATCtGCCAGGCCTTT       | R146C                   | RRM1   | $\alpha$ helix                   | 0.97                      | Colon adenocarcinoma      | (3)                 | WES                 |
| PUF60-487G>A                 | ACATGTCCTGGaACTCCGTCACC       | D163N                   | RRM1   | $\beta$ sheet                    | 0.96                      | Hairy cell leukaemia      | (4)                 | WES                 |
| PUF60-493G>A                 | CCTGGGACTCCaTCACCATGAAG       | V165I                   | RRM1   | not assigned                     | 0.99                      | Colon adenocarcinoma      | ICGC(COAD-US)       | WES                 |
| PUF60-688G>A                 | ACCGCATCTAcTAGGCCTCTGTG       | V230M                   | RRM2   | $\beta$ sheet                    | 0.97                      | Malignant melanoma        | (5)                 | WGS                 |
| PUF60-691G>C                 | GCATCTACGTGcCCTCTGTGCAC       | A231P                   | RRM2   | $\beta$ sheet                    | 0.98                      | Prostate cancer           | (6)                 | WES                 |
| PUF60-719A>T                 | CCTCTCAGACGtTGACATCAAGA       | D240V                   | RRM2   | $\alpha$ helix                   | 0.98                      | Prostate cancer           | (7)                 | WES                 |
| PUF60-761_762CC>TT           | GCAAGATCAAGTtTGACACTGGCC      | S254F                   | RRM2   | $\beta$ sheet                    | N.A.                      | Squamous cell carcinoma   | (8)                 | WES                 |
| PUF60-776G>A                 | CACACTGGCCCaGGACCCACAA        | R259Q                   | RRM2   | $\beta$ sheet                    | 0.98                      | Colon adenocarcinoma      | (9)                 | WES                 |
| PUF60-802G>A                 | GCAAGCACAAAGaGCTACGGCTTC      | G268S                   | RRM2   | $\beta$ sheet                    | 0.96                      | Colon adenocarcinoma      | (9)                 | WES                 |
| PUF60-825G>T                 | ATTGAGTACGAtaAAGGCCAGTCG      | E275D                   | RRM2   | bend                             | 0.96                      | Endometroid carcinoma     | ICGC(UCEC-US)       | WGS                 |
| PUF60-892C>T                 | GCCAGTACTTgGGGTGGCAAGG        | R298W                   | RRM2   | $\beta$ sheet                    | 0.96                      | Colon adenocarcinoma      | (9)                 | WES                 |
| U2AF65-460G>A                | GCCTCTACGTGaGAACATCCCC        | G154S                   | RRM1   | $\beta$ sheet                    | 0.94                      | Myelodysplastic syndrome  | (10)                | TES                 |
| U2AF65-461G>T                | CCTCTACGTGtCaACATCCCCT        | G154V                   | RRM1   | $\beta$ sheet                    | 0.96                      | AML                       | (11)                | TES                 |
| U2AF65-484G>A                | TTGGCCTACATaAGGAGGCCATG       | E162K                   | RRM1   | $\alpha$ helix                   | 0.95                      | Bladder carcinoma         | (12)                | WES                 |
| U2AF65-485A>T                | TGGCATCACTGtGGAGGCCATGA       | E162V                   | RRM1   | $\alpha$ helix                   | 0.97                      | Melanoma                  | ICGC(SKCM-US)       | WES                 |
| U2AF65-527G>T                | GATGCGCCTGGtGGGGCTGACCC       | G176V                   | RRM1   | $\alpha$ helix                   | 0.94                      | Liver carcinoma           | TCGA-CC-A7IH-01     | WES                 |
| U2AF65-527G>A                | GATGCGCCTGGaGGGGCTGACCC       | G176E                   | RRM1   | $\alpha$ helix                   | 0.93                      | Lung adenocarcinoma       | ICGC(LUAD-US)       | WGS                 |
| U2AF65-527G>C                | GATGCGCCTGGcGGGGCTGACCC       | G176A                   | RRM1   | $\alpha$ helix                   | 0.93                      | Breast carcinoma          | 27135926            | WES                 |
| U2AF65-569A>T                | GTTGCTGTGtGcGATTAACCAGG       | Q190L                   | RRM1   | $\beta$ sheet                    | 0.98                      | CLL                       | (14)                | WES                 |
| U2AF65-584A>G                | TAACCAGGACAgGAATTTGCTT        | K195R                   | RRM1   | turn                             | 0.98                      | T-cell leukaemia          | (15)                | WES                 |
| U2AF65-588T>A                | CAGGACAAGAAaTTTGCCTTTTT       | N196K                   | RRM1   | turn                             | 0.80                      | AML                       | ICGC(LAML-KR)       | WES                 |
| U2AF65-620A>G                | CTCAGTGGACgGACTACCCAGG        | E207G                   | RRM1   | $\alpha$ helix                   | 0.98                      | Melanoma                  | ICGC(SKCM-US)       | WES                 |
| U2AF65-631G>A                | AGACTACCCAGaCTATGGCCTTT       | A211T                   | RRM1   | $\alpha$ helix                   | 0.98                      | Prostate cancer cell line | 23856246            | WES                 |
| U2AF65-790G>T                | AGCTGTTATCtGGGGCTTACCC        | G264W                   | RRM2   | $\beta$ sheet                    | 0.99                      | Liver carcinoma           | ICGC(LICA-CN)       | WES                 |
| U2AF65-817G>A                | ACCTGAACGATaACCAGGTCAAA       | D273N                   | RRM2   | $\alpha$ helix                   | 0.99                      | Squamous cell carcinoma   | (8)                 | WES                 |
| U2AF65-876G>T                | AACCTGGTCAaGACAGTGCCAC        | K292N                   | RRM2   | $\beta$ sheet                    | 0.89                      | Colorectal carcinoma      | (17)                | WES                 |
| U2AF65-901G>A                | GGCTCTCCAAGaGCTACGCCTTC       | G301S                   | RRM2   | $\beta$ sheet                    | 0.97                      | Renal carcinoma           | ICGC(KIRP-US)       | WES                 |
| U2AF65-908C>T                | CAAGGGCTACGtCTTCTGTGAGT       | A303V                   | RRM2   | $\beta$ sheet                    | 0.93                      | Melanoma                  | (18)                | WES                 |
| U2AF65-922G>A                | TCTGTGAGTAcTAGGACATCAAC       | V308M                   | RRM2   | bend                             | 0.96                      | Melanoma                  | (19)                | WES                 |
| U2AF65-956G>T                | GGCCATTGCGtGCTGAACGGCA        | G319V                   | RRM2   | $\alpha$ helix                   | 0.97                      | Cervix adenocarcinoma     | ICGC(CESC-US)       | WGS                 |
| U2AF65-955G>A                | AGGCCATTGCGaGGCTGAACGGC       | G319R                   | RRM2   | $\alpha$ helix                   | 0.97                      | Squamous cell carcinoma   | (20)                | WES                 |
| U2AF65-977G>T                | CATGCAGCTGGtGGATAAGAAGC       | G326V                   | RRM2   | turn                             | 0.97                      | Glioma                    | TCGA-HT-A4DV-01     | WES                 |
| U2AF65-976G>A                | GCATGCAGCTGaGGGATAAGAAG       | G326R                   | RRM2   | turn                             | 0.98                      | Lung adenocarcinoma       | (21)                | WES                 |
| U2AF65-977G>A                | CATGCAGCTGGaGGATAAGAAGC       | G326E                   | RRM2   | turn                             | 0.97                      | Pancreatic carc.          | ICGC(PACA-IT)       | WES                 |
| U2AF65 (PUF60 H169Y paralog) | AGATTAACCAgACAAGAATTTTG       | D194Y                   | RRM1   | turn                             | N.A.                      | Germline PUF60 deficiency | (22)                | WES                 |

Legend: <sup>1</sup>Mutated positions are in lower case. <sup>2</sup> PDB accession numbers: 5KWQ (PUF60) and 2YH1 (U2AF65). <sup>3</sup> COSMIC database (v. 91). WES, whole exome sequencing; WGS, whole genome sequencing; TES, targeted exome sequencing.

**Table S2 Cloning and RT-PCR primers**

| <b>Primer</b>                    | <b>Sequence (5'-3')</b>           |
|----------------------------------|-----------------------------------|
| <b>Expression plasmids</b>       |                                   |
| SF3B4-49F- <i>BamI</i>           | ATTAGGATCCAGACGGCGGGATCTCTTT      |
| SF3B4-49R- <i>XbaI</i>           | ATTATCTAGACTGAGGGAGAGGGCCTCGAAGTG |
| U2AF2-R- <i>XhoI</i>             | ATTACTCGAGCCAGAAGTCCCGGCGGTGAT    |
| <b>PUF60 and U2AF2 minigenes</b> |                                   |
| PUF60-E6-F                       | ACCACTCGAGCTGCCTCCTGACCATCTGTC    |
| PUF60-E9-R                       | ACCATCTAGACCCTGGTCTGGCTACTCAAG    |
| U2AF2-E5-F                       | ACCACTCGAGCTTCTGAGGAGCAGCAGTT     |
| U2AF2-E5-R                       | ACCATCTAGAGGGTTGCTGGAGGAGGTT      |
| U2AF2-E6-F                       | ACCACTCGAGTGTGTCATCATGCCCTCTG     |
| U2AF2-E6-R                       | ACCATCTAGACTGGAAAAGGCCAAAGAGGT    |
| U2AF2-E7-F                       | ACCACTCGAGCAGCACTTTGTCCCTCTTCC    |
| U2AF2-E7-F                       | ACCATCTAGATTTGGTCTGATCCTGGCTCT    |
| U2AF2-E8-E10-F                   | ACCACTCGAGTGTGAACTTTGTGCCTTTGG    |
| U2AF2-E8-E10-F                   | ACCATCTAGACCAGTCTCCCTCTGCTCAAG    |
| <b>RT-PCR</b>                    |                                   |
| Vector primer PL3                | GGGAGACCCAAGCTGGCTA               |
| Vector primer PL4                | AGTCGAGGCTGATCAGCGG               |
| 35F                              | CAGGTGCTCTCGGTTGCA                |
| 35m-amplF                        | GCTCGGATCCTACAGAGTCAA             |
| U2AF2_E10R                       | CTCTGGACCAGCAGCTTCTT              |
| U2AF2_E9F                        | AACCTGGTCAAGGACAGTGCCAC           |
| U2AF2_E9R                        | GCACTGTCCTTGACCAGGTT              |
| PUF60_E7F                        | GCCTTGGAGCAGATGAACTC              |
| PUF60_E7R                        | AGCTTCGGGGACCTCATACT              |
| UBE2F-F                          | GCATTTTCCTGATCCAAACAA             |
| UBE2F-R                          | CCCTGTCTCTGTGATGTTGG              |
| UBE2F-cr                         | GCTAACAGTAACCCCAGGATT             |

## Figure S1 Sequences of wild-type splicing reporter inserts

Full reporters are schematically shown in Figures 1A, 3B and 5. Exons are in upper case and intronic sequences are in lower case. Restriction sites are underlined. Tested exons (highlighted and in bold) and flanking intronic sequences are in black, *U2AF1* exons 2 and 4 and flanking intronic sequences are in grey. Conserved dinucleotides at cryptic (*UBE2F* and *GANAB*) or alternative (*U2AF2*) splice sites are in red. Plasmid mutations are shown in Table S1.

### *UBE2F*

ggatcc**TACAGAGTCAACTGTTTCA**TTTTATTTCAA**AATGGAGCATGTCGTCATGGAGACAGGTGCTCTCGGTTG**  
**CACAATAAACCGACGTTTAGCCAG**gtttggttgcccttttttcatgtaaattataaaaaacttcatgttcttttca  
aagacagttaatttctacatattaagcaagtcattttttctctcgtagttgtattttccatttgggttcataagt  
gtgttcttttatttaataatagtgaggcaggtgatcgacttccagtgggaaggtctgagaccaccactccttggt  
tttatcattagagaaaactttaaaaatcagtttttgatggttggctgtgctcctgatatttgcctgc  
catcttccctacccctctgatagacatgggtccagaggggtggccgtgcccagccttgggttagcctcctccag  
gcaccagtgggacacggagtggtgcttctgctccttggctgtcctcagacagtagaggtgatggagccaccttcaa  
gtttagcgtgattgtcaccaggcccatcatgctgctcgagctgttctgaaggctgcatcaagcaatcactgaggca  
gtgattctgtcaggttcaactgctgtgtcccaaggcctagaaccatgccagcagaggttgggtgctcagtaagg  
gtttggttggtgactgttagtcttgtgtcctccaattgacattctcttggggagaccagcagtaagcagataaaga  
agtcacttaaggcatgagatgtgttcggaggggttaggttccaggaacatggtaggatgcaaggaggccaggca  
gatggccccagaaggatgtcccttcccttccctgaggggtgtgctcagccccctgagaagacagacaggcaggtga  
cagcatggagcccatttctgttcaggcaggggcaggacttccaccagtgtgtgtgcatttgggtgatggaaccgag  
gaactctgcaggcctgttttttaactcctgattctctgtatttggccatatcctaacagagtgtttgctttttgtt  
tccttttttttttaatttaaagattttttgttttgttttggatag**ATGAGGGTTACTACCAGGGT**  
**GGAAAATTTAGTTTGA****AACTGAAGTTCCCGATGCGTACAACATGGTG**gtgagtagcctgcgttgagcctgttgt  
tttacttctcggggggggtgcctgtggctgtggcccgccactggcacagggccctagcactcccctctgcgtgt  
gtccatgtgtgactgagtactcacttcagtatttttgtgatgaatgtcactcatcagcagtagtttagagtgttag  
tagagaattccgtttattcagcaaaatacttatgagtactatgtgccaggcagcctgctgtgtattttctataac  
tcttatctgttacagctctggcactgaagaaaaaagcatttaataaaatgactgtagttttgttcatgatataac  
accaaaattccagaagtctataaaatgtgtattttagaatttcagagaaacagtgacttgtagtttaactataag  
taatttataoctatagtttcatgttaatccctcaaagatccttttagacaataattataccaaataaccattacat  
tatgtctttgctttgggtggaacttctaga<sup>a</sup>taatctcgtgtgtgttactgtagcagtttgagtttaacacaagag  
ttcactcgggttaacatgttctaacccagcaagatttctgttgtttgcag**GTGCCGTGAGCGATGTGGAGATGCAGG**  
**AACACTATGATGAGTTTTTTGAG**gggccc

**GANAB**

gaattcg**GCTTTCTGTCTCTGGTCGTGATGAGAACAGTGTGGAGTTAACCATGGCTGAGGGACCTACAAGATCA**  
**TCTTGACAGCACGGCCATTCCGCCTTGACCTACTAGAGGACCGAAGTCTTTTGCTTAGTGCAATGCCCGAGGAC**  
**TCTTGGAGTTTGAGCATCAGAGGGCCCCTAGGGTCTC**gtgagtacaggggttgggactgcagggaacctagtgtg  
aaagagcataggggtgttgtgaggtctggcacggggaggagacggtggtgggacagccaggtagggcctgggggc  
tgggagaagctctctgtcagggagggtaggaaccagaccgggtgcggttttttccatttctgtacagaccagg  
aggcagtcacttttgtccctgagctgtaccctgggcatctctgggagggcctgcctgggtctgtgtctctctctc  
cccttctcacatcatcacatttcccagatttattttcttctgtttttatttatttatttttttggtttctttttc  
ccccatctctggaagtttgtcgaactgaaactcacttttatgtttctgtttttgtgttggttttgtgcctctttt  
tccccctccctaccatctctctctgccccag**TTTCTCGGATAAGGTTAATCTCACGCTTGGTAGCATATGGGAT**  
**AAGATCAAGAACCTTTTCTCTAG**gtaaatccatggccaccggtactgtatctgttctctgccttaccattcc  
tcactctagcctttggggggaggtgccccagacccttccagcctttcactcacccttctccctgctgtgtga  
tgtctgggtcctgttacctgttaccctggctgggagccccagaagaaggaaggtgagatactgaaagtcaggtcc  
ttcgggaatgtagggagcttattgctttgccaggggatggagagatgctgcctattgctgggttctctgactctc  
agctgagggggcacctgaggttctgggcagagctacttggccttgaaagcatttttggcagaatctcttgaagtc  
cctatgtatgtctgtagaggttggatagtatgaccacatgcctttgcaaagccattgtgtcaggccaggagg  
ctgagggcccagggagagcacttggggccagaatctctcagtagaggcaacagagccaggattggcattcataacc  
caggccccatgaatcattctgcctttctctctctgggatgttgacagaggtggtgttcaggcctgtgcctcctggt  
ggcacttattcctcattttcctttctcatttctctccccatcctttgcaaacttatctgctcattgtgggttccc  
tctcca**ag**ctttaacatttagtcccttctccaatgccttctgttcttcttggacccttggctctctattccccaac  
ccctccttccact**ag**ccccctctgccccctctggattggagcagacagctctctaccttccag**GCAAGGA**  
**TCAAAAGACCCAGCTGAGGGCGATGGGGCCCAGCCTGAGGAAACACCCAGGGATGGCGACAAG**gcaagttctaga

OGDH

ggatccTACAGAGTCAACTGTTTCAATTTTATTTCAAATTTGGAGCATGTCGTCATGGAGACAGGTGCTCTCGGTTG  
CACAAATAAACCGACGTTTAGCCAGgtttgtttgcctttttttcatgtaaattataaaaaacttcatgttcttttca  
aagacagttaatctacatattaagcaagtcattttttctctcgtagttgtatcttccatttgtgttcataagt  
gtgttctttttatftaaataatagtgaggcaggtgatcgacttccagtgggaaggtctgagaccaccactcctgtt  
ttatcattagagaaactttaaaaatcagtttttgatgtttgtgtgttggctgtgcctgatatttgcctgcctgc  
catcttccctaccctctgatagacatgggtccagaggggtggccgtgcccagccttgggttagcctcctccag  
gcaccagtgagacacggagtggttctgtcttttgccttccagacagtagaggtgatggagccaccttccaa  
gttagcgtgattgtcaccaggcccatcatgctgctcgcaggttttgggttctggtggcatgggcatgggcaggtgtt  
gtaatggggcaacataggggaggtcctgggtctctggcccttcatgccatggcctggcaagtaaggctctctccc  
tggggcaagtgtattctgccttagaaaggagatgcatggagttttgtaaatgctatatgctttaaagtgttatcc  
atgtggatatttgcataaggaggaagcccagtggtgtttctttatcactgcctgcacgcagttggcctcagtaac  
aacttcagcctgatcttgcagtgacttaccagcagctgctcccttctcaaattgctagcaagaagttgtgaaaga  
atcttaaattggaagggattttctttctccttttgggttttaaatagttcaaatacagatgctttaaagctgtgtgt  
gtagcaggggtttttgttctgactactgtgtgtgacctaactcagcagcagcagcagcagcagcagcagcagcagc  
acgggatataataaaaggcaaaccttctcttagtgagatgacctcttatctgcaactcctcccagttaaggcc  
aacacttaagccttcatcttctacttagaaaaatctttaaatttgatttattttaaattgaggtgggatc  
tactgtgttgcaggttggcctcaaactcctaggctcaagagatcctcctacctcagcctcccagtagctgg  
aactacaggtatgtgacctgtaccagcacttagggaaatgtttatgttctgagctgaggcaggttccactt  
ggagtaagaattgcccagcatalctcatttctgtttatccatggaaactgtataaagatcacaagaaatggatcc  
ttcagactcctaagtttatcataacctgagtttatctctttttataaaaagtacatttatgcacaatagtgctt  
ttaaataagttattccaagacttttaaaaactaattttgtcgtatgggtttattggtgctgtgttctctttgg  
aaaaggtttgcataacctgtgactcttttaacctccccacagctcactggatctgcttaatgacttgcttgtgt  
tattgcttccag**GTCAGGGGTCACCACATTGCAAACTTGATCCTCTCGGAATTAGTTGTGTAAATTTTGATGAT**  
**GCTCCAGTAACTGTTTCTTCAAACGTGG**gtgagaattaagctgtaaattgtaatttttaattgtatctttt  
ttttacccttccctctttttttttcttctgtccttttgtgtgtgtccttccctctcatcgttggcactcatag  
**ATACGAGGGCACCATGTAGCACAGCTGGACCCCTGGGGATTTTGGATGCTGATCTGGACTCCTCCGTGCCCGCT**  
**GACATTATCTCATCCACAGACAACTTG**gtgagggctctgagagcagtcagctgcgttgcttgagctcctctcgt  
gtgccacgacctgtggttagccaggatgtccaggcaggagggaaaggctcttaagtttctttcattctgatcact  
tgaaatttatcgggtattgtagccttagtggttttgggcaagttatctttatcttactttttcagccagattgct  
ttaagtctcaaaatttgaaaataaaattttggacagaaaggtttgtggcacagggaaaaagcttgtccacctggg  
gcaggtggatcagaagcacttcagagtatagctcttttggcttcaggttttcaaagtcagtcagcagcactgcctt  
cagtgaggcatgtccatgaggccttgctcaggaactgctgacacagccatccttttctgaagcccagtggtgct  
gcccttgactggaggccatgtcccttaggggacgaattctagataaatctcgtgtgtgttactgtagcagtttgag  
tttaaacacaagagttcactcgggttaacatgttcttaaccagcaagatttctgttgtttgcag**GTGCCGTGAGCGA**  
**TGTGGAGATGCAGGAACACTATGATGAGTTTTTTGAG**gggccc

**U2AF2 exon 5**

ggatccTACAGAGTCAACTGTTCAATTTATTTCAAATTTGGAGCATGTCGTCATGGAGACAGGTGCTCTCGGTTG  
CACAATAAACCGACGTTTAGCCAGgtttggttgcccttttttcatgtaaattataaaaaacttcatgttcttttca  
aagacagttaatttctacatattaagcaagtcattttttctctcgtagttgtattttccatttgtgttcataagt  
gtgttcttttatttaataatagtgaggcaggtgatcgacttccagtggaggctctgagaccaccactccttgtt  
tttatcattagagaaaactttaaaaatcagtttttgatggttggtgtgttggtgtgctgatatttgcctgc  
catcttccctacccctctgatagacatgggtccagaggggtggccgtgcccagccttgggttagcctcctccag  
gcaccagtggacacggagtggtgttctgctctttgctgtctccagacagtagaggtgatggagccaccttccaa  
gttagcgtgattgtcaccaggcccatcatgctgctcgaggcttctgaggagcagcagttactgggtgggggcccc  
gaggggtggaaagaggggttctggaaggtgctaagaccgagagcctgtaggagccttctgctgaggaggggaactcc  
cagtggtggtgagggggtggtcactgagcattcccctgatgggttttatccggcttttattcccttgaagCTG  
CGGGTCAGATTCCAGCCACTGCTCTTCTCCCCACCATGACCCCTGACGGTCTGGCTGTGACCCCAACGCCGGTGC  
CCGTGGTCGGGAGCCAGATGACCAGACAAGCCCGCGCCTCTACGTGGGCAACATCCCTTTGGCATCACTGAGg  
tactgcctccccctgccccctaccctctcccttgtccctctaccctgttccctccccctccctccattccctttcc  
ccaacctgcaagggtcagactctgctcctgcaagacccccggccccctcccagacggaccgatggagttgagcc  
agccaggggcccgggtggtgggtggccctccctccctcctcttccccctctcccgtctcccctcccccaacctcct  
ccagcaacctctctagaataatctcgtgtgtgttactgtagcagtttgagtttaaacacaagagttcactcggttaa  
catgttctaaccagcaagatttctgttgttgcagGTGCCGTGAGCGATGTGGAGATGCAGGAACACTATGATGA  
GTTTTTTGAGgggccc

**U2AF2 exon 6**

ggatccTACAGAGTCAACTGTTCAATTTATTTCAAATTTGGAGCATGTCGTCATGGAGACAGGTGCTCTCGGTTG  
CACAATAAACCGACGTTTAGCCAGgtttggttgcccttttttcatgtaaattataaaaaacttcatgttcttttca  
aagacagttaatttctacatattaagcaagtcattttttctctcgtagttgtattttccatttgtgttcataagt  
gtgttcttttatttaataatagtgaggcaggtgatcgacttccagtggaggctctgagaccaccactccttgtt  
tttatcattagagaaaactttaaaaatcagtttttgatggttggtgtgttggtgtgctgatatttgcctgc  
catcttccctacccctctgatagacatgggtccagaggggtggccgtgcccagccttgggttagcctcctccag  
gcaccagtggacacggagtggtgttctgctctttgctgtctccagacagtagaggtgatggagccaccttccaa  
gttagcgtgattgtcaccaggcccatcatgctgctcgaggcttctgagcctctgcttttcttgaacaat  
cttctcctttccccctgattttttggggccccctgtggctgtcccccaacgcctgtccatcgctgccccttggcct  
ctcttgcactgcttccctccccattttctctcttctgttcttactattgacttctacacccccaccat  
tccactgttccctccccccccctcctccctccctccatccctctccccttaccaccccaacccctctgtgtctccctc  
tctacccttccccctcctctctccacctcccttccccggcccccccccttgtctcctattccctctgcagGAGGC  
CATGATGGATTTCTTCAACGCCAGATGCGCCTGGGGGGGCTGACCCAGGCCCTGGCAACCCAGTGTGGCTGT  
GCAGATTAACCAGGACAAGAATTTGCTTTTTGGAGgtgagctgggggagtgagtgaggtccaggaaacgtgtg  
tgatgtgagggcccagcccttaggctgatgttgtgtggagctgccttgtgtctgttccaccaggccctctgcagc  
ctcttctccaccggctcgtgaagtgagccctgttatagcattacagatctgatcctactttctgcttccatt  
gctttctgtgtgacctgagagggcctgtttggcctctgtagaccttggccttttccagctctagaataatctcgt  
gtgtgttactgtagcagtttgagtttaaacacaagagttcactcggttaacatgttctaaccagcaagatttctg  
ttgtttgcagGTGCCGTGAGCGATGTGGAGATGCAGGAACACTATGATGAGTTTTTTGAGgggccc

**U2AF2 exon 7**

ggatccTACAGAGTCAACTGTTCAATTTATTTCAAATTTGGAGCATGTCGTCATGGAGACAGGTGCTCTCGGTTG  
CACAATAAACCGACGTTTAGCCAGgtttggttgcccttttttcatgtaaattataaaaaacttcatgttcttttca  
aagacagttaatttctacatattaagcaagtcattttttctctcgtagttgtattttccatttgtgttcataagt  
gtgttcttttatttaataatagtgaggcaggtgatcgacttccagtggaggctctgagaccaccactccttgtt  
tttatcattagagaaaactttaaaaatcagtttttgatggttggtgtgttggtgtgctgatatttgcctgc  
catcttccctacccctctgatagacatgggtccagaggggtggccgtgcccagccttgggttagcctcctccag  
gcaccagtggacacggagtggtgttctgctctttgctgtctccagacagtagaggtgatggagccaccttccaa  
gttagcgtgattgtcaccaggcccatcatgctgctcgaggcacttctgcccctctccctgtctcatcacagcctg  
caattgtgtgttggcctctgtgttgggtgcccctgggtgtttttaatggtcagtggtgagctcctggcagca  
gggacatgcgtgtctgttgtactcccagtgcccagcctggggcctggcatgttgtatattgttcacatgagtgaaa  
ggaaagaggaaatcccaatcctggaacactaggggtgtaactagtcctgacccccatcctcaccactccttct  
tctttcattcagTTCCGCTCAGTGACGAGACTACCCAGGCTATGGCCTTTGATGGCATCATCTTCCAGGGCCAG  
TCACTAAAGATCCGCAGGCCCTCACGACTACCAGCCGCTTCCTGGCATGTCAGAGAACCCCTCCGCTCATGTGCCCT

Ggtgagtgggggatccattaagggccctttctcccccaatcctgttcccatggcctgtccatcccttcagccca  
gctggagtggttaggaagttgtgtaagtactgtggaagataggtgccttttccctgcttaccctaagtctctgt  
gagtggggtgctctcctgctggtagagaaggtgcctagggccgggagaatgagctgtcacctgctgaggacacac  
agcttgtacgtggcagagccaggatcagaccaaatctaga<sup>taatctcgtgtgtgttactgtagcagtttgagttt</sup>  
aaacacaagagttcactcgggtaacatgttctaaccagcaagatttctgttgtttgcagGTGCCGTGAGCGATGT  
GGAGATGCAGGAACACTATGATGAGTTTTTTGAG<sup>gggccc</sup>

**U2AF2 exons 8-10**

ggatccTACAGAGTCAACTGTTCAATTTATTTCAAATTTGGAGCATGTCGTCATGGAGACAGGTGCTCTCGGTTG  
CACAAATAAACCGACGTTTAGCCAG<sup>gtttggttgctttttttcatgtaaattataaaaaacttcatgttcttttca</sup>  
aagacagttaatctacatattaagcaagtcattttttctctcgtagttgtattttccatttgggttcataagt  
gtgttcttttatttaataatagtgagggcaggtgatcgacttccagtggaaggtctgagaccaccactccttgtt  
tttatcattagagaaactttaaaaatcagtttttgatgtttgtgtgttggctgtgcctgatatttgcctgc  
catcttccctacccctctgatagacatgggtccagaggggggtggccgtgcccagccttgggttagcctcctccag  
gcaccagtgagacacggagtggtgctttctgctctttgctgtctccagacagtagaggtgatggagccaccttccaa  
gttagcgtgattgtcaccaggcccatcatgctgctcgagtggtgaactttgtgcctttggagcgttctggaggatg  
ttctagtttgaggttcccctgaggtggtgagatgttgggagacatggtgcttctccccgaggagcctctgtgtg  
ccactgcccaggaccctcactggtcagataaggctgggggtgggtgggacgtggcgaccctcctcgtcagat  
caggcaggaagtggtctctttggcaattgaggagctcgcctgtagactgtccaggttttgggagataacctggtac  
tgggaattgaagtcctcctctctaccatagGGGTTGTGTCCACTGTGGTCCCCGACTCTGCCACAAGCTGT  
TCATCGGGGGCTTACCCAACCTGAACGATGACCAG<sup>gtaacttccctgctcctccagaccgctccccac</sup>  
ccgccccacctcatcccagccctgatggactctcggctactgcagGTCAAAGAGCTGCTGACATCCTTTGGGCC  
CCTCAAGGCCTTCAACCTGGTCAAGGACAGTGCCACGGGGCTCTCCAAGGGCTACGCCCTTCTGTGAGTACGTGGA  
CATCAACGTCACGGATCAG<sup>gtgagtccccggctcgtggtggccgtgcccgtctgtccttccctgcccctgcccgtgtt</sup>  
gccaagccatggtctcccctcctcaggggacggggcgggagggcgccaacctgaggcagtgcccctgctgtgtggc  
tcgtccctgtcccattggcggttggctttttccaggctcttaatcccctttgcttcccctcttccccaccaatgc  
cccggcttgggggtaggtgtcgggctcctggtccctgaccccacctctcccgcacccccgacccctcatctc  
caaacacagGCCATTGCGGGGCTGAACGGCATGCAGCTGGGGGATAAGAAGCTGCTGGTCCAGAGGGCGAGTGTG  
GGAGCCAAGAATGCCACGCTG<sup>gtgagccccccg</sup>gcacgtcatcttccattggcttgagggaccctgggggtggga  
ggggctggctagtaggggacaagtgttccctgatctttctcccagcttccatgggaaggcatttggggggcattca  
gtgcagtggtggggagtcgggctttaggtgttggagtggtgagagatggccttccccctgggggggacgtgaggg  
gcctaggttgagcagaggggagactggtctaga<sup>taatctcgtgtgtgttactgtagcagtttgagtttaacaca</sup>  
agagttcactcgggtaacatgttctaaccagcaagatttctgttgtttgcagGTGCCGTGAGCGATGTGGAGATG  
CAGGAACACTATGATGAGTTTTTTGAG<sup>gggccc</sup>



**PUF60 exons 6-9**

ggatcc**TACAGAGTCAACTGTTTCAATTTTATTTCAA**AATTGGAGCATGTCGTCATGGAGACAGGTGCTCTCGGTTG  
**CACAATAAACCGACGTTTAGCCAG**gtttggttgcccttttttcatgtaaaattataaaaacttcatgttcttttca  
aagacagttaatttctacatattaagcaagtcattttttctctcgtagttgtattttccatttgtgttcataagt  
gtgttcttttatttaataatagtgaggcaggtgatcgacttccagtggaaggtctgagaccaccactccttgtt  
tttatcattagagaaactttaaaaatcagtttttgatgtttgtgtgttggctgtgcctgatatttgcctgcctgc  
catcttccctacccccctctgatagacatgggtccagaggggtggccgtgccagccttgggttagcctcctccag  
gcaccagtggaacaggagtggtgcttctgctctttgctgtctccagacagtagaggtgatggagccaccttccaa  
gttagcgtgattgtcaccaggcccatcatgctgctc**gcgag**ctgcctcctgaccatctgtcggctttgctgccgag  
tctgcctgggaccttggcgggctggggtgctcctgtcctgccgctggcctggccttcttcttgggtggcgg  
ggtcctgcgacccccacactatgactgcagggatggagcccgcacctcctgtcatgtggggagccctcccaca  
gcagggtgggtgggtgggaggggagtggtgctgcccagcttctcctgcccctgacgagccagcagcgttct  
ctcccctctgtcctgctgcag**ATGGCGGCTCAGCGGCAGCGGGCGCTGGCCATCATGTGCCGCTCTACGTGGGC**  
**TCTATCTACTATGAGCTGGGGGAGGACACCATCCGCCAGGCCTTTGCCCCCTTTGGCCCCATCAAGAGCATCGAC**  
**ATGTCCTGGGACTCCGTCAACATGAAGCACAAG**gtcagcaggttgggtccgccccggcacttcgggctgcctcc  
caccccctgggctcgcgcagcctgacaggtgtgtccctgtgtctag**GGCTTTGCCTTCGTGGAGTATGAGGTCCCC**  
**GAAGCTGCACAGCTGGCCTTGGAGCAGATGAACTCGGTGATGCTGGGGGGCAGGAACATCAAG**gtgaggcagggg  
gccaaggcctcgatcccgcagggcgtgcagggctgccctccacggaagccttttgtggccgggctgggttgacc  
ggtctttccatctcaccgcctcttccccag**GTGGGCAGACCCAGCAACATAGGGCAGGCCAGCCCATCATAGAC**  
**CAGTTGGCTGAGGAGGCACGGGCCTTCAACCGCATCTACGTGGCCTCTGTGCACCAGGACCTCTCAGACGATGAC**  
**ATCAAGAGCGTGTGTTGAGGCCTTTGGCAAGATCAAGTCTGCACACTGGCCCGGGACCCACAAC****TGGCAAGCAA**  
**AGGGCTACGGCTTCATTG**gtgagctggggtggctgagggcgggatgggggcccactgaggtctgggctggcctg  
tactgtgtcctcctgcccacag**AGTACGAGAAGGCCAGTCGTCCCAAGATGCTGTGTCTTCCATGAACCTCTTT**  
**GACCTGGGTGGCCAGTACTTGGCGGTGGGCAAGGCTGTACACCCGCCCATGCCCTACTCACACCAGCCACGCCT**  
**GGAGGCCTCCCACCTGCCGCTGCTGTGGCAGCTGCTGCAGCCACTGCCAAGATCACAGCTCAG**gtgagggcccac  
acagctgtcggcttgaggggtgggagggtggcccctgattccttggagactgattcaaggtggtccttgagtagcc  
agaccaggg**ctaga**taatctcgtgtgtgttactgtagcagtttgagtttaaacacaagagttcactcgggttaac  
atgttctaaccagcaagatttctgttgtttgcag**GTGCCGTGAGCGATGTGGAGATGCAGGAACACTATGATGAG**  
**TTTTTTGAG**gggccc

## Figure S2 Alignment of human U2AF65, PUF60 and SF3B4 RRMs

Residues that sustained missense mutations in cancer (23) are in red; residues tested in this work are highlighted in yellow. Substitution D231V that selectively increased affinity for uridines and discriminated against purines in a short synthetic PPT-derived DNA (24) is highlighted in grey. A conserved aromatic residue that recognized a guanine in *syn* (24) is in magenta. Residues mutated in the Verheij syndrome (22,25) are highlighted in green. rU7-U2AF65, side chain contacts (s), water-mediated contacts (w) and main chain contacts (m) were compiled from the structure of the human U2AF65/rU7 complex (26).

### RRM1

```

rU7-U2AF65      s s ww
PUF60-RRM1     CRVYVGSIIYYEIGEDTIRQAFAPF-----GPIKSIMSWDSVTMKKGFAFVEY177
U2AF65-RRM1    RRLYVGNIPFGITEEAMMDFFNAQMRLGGLTQAPGNPVLAV-----QINQDKNFAFLEF202
SF3B4-RRM1     ATVYVGGLDEKVSEPLLWELFLQA-----GPVVNTHMPKDRVTGQHQGYGFVEF
                :***.: : * : : * .*: :...:***:

                m
rU7-U2AF65      s m sm
PUF60-RRM1     EVPEAAQLALEQMNSVMLGGRNIKVGRPSN207
U2AF65-RRM1    RSVDEETTQAAMA-FDGIIFQGQSLKIRRPH231
SF3B4-RRM1     LSEDDADYAIKIMNMIKLYGKPIRVNKASA
                : : * : : : * : : : :

```

### RRM2

```

rU7-U2AF65      w
                s s ss s
PUF60-RRM2     NRIYVASVHQDLSDDDIKSVFEAFGKIK-SCTLARDPPTTGKHKCYGFIEYEEKAQSSQDAV283
U2AF65-RRM2    HKLFIGGLPNYLNDDQVKELLSFGPLK-AFNLVKDSATGLSKGYAFCEYVDINVTQAI317
SF3B4-RRM2     ANIFIGNLDPEIDEKLLYDTFSAFGVILQTPKIMRDPDTGNSKGYAFINFASFDASDAAI
                :...: :..: : : ** : : : * ** ***. * : : : : * :

                w
rU7-U2AF65      ss s m
PUF60-RRM2     SSMNLFDLGGQYLSVGKAVT303
U2AF65-RRM2    AGLNGMQLCDKKLLVQRASV337
SF3B4-RRM2     EAMNGQYLCNRPITVSYAFK
                .:* * : : * *

```

**Figure S3 Splicing pattern of PUF60-/U2AF65-dependent reporters in cells overexpressing SF3B4**

**A**, Amino-acid substitutions in SF3B4 in cancer. Data are from the COSMIC database, v. 83 (23). Data could not be corrected for multiple database entries from the same patients or other redundancies (Dave Beare, COSMIC, the Sanger Centre, personal communication). **B**, Coexpression of the *UBE2F* (upper panel) or *OGDH* (middle panel) reporters with human SF3B4 and controls in human embryonic kidney 293 cells. RNA products (to the right) are schematically shown in Figure 1. Immunoblot from transfected cells is in the lower panel.

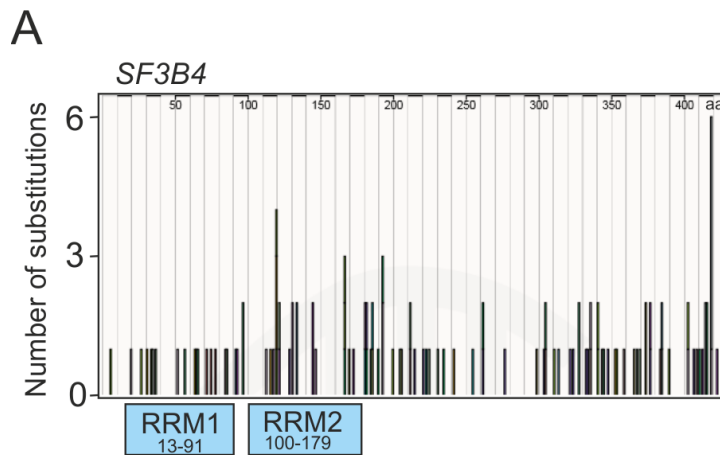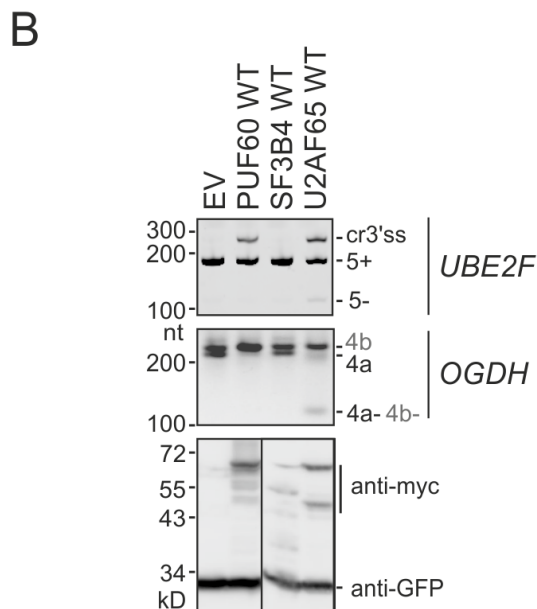

**Figure S4 U2AF65 E162K binding to oligoribonucleotides derived from canonical and cryptic 3'ss of *UBE2F* exon 5**

**A**, EMSA with purified recombinant U2AF65 E162K and RNAs indicated at the bottom. The amounts of proteins and RNAs were the same as for the WT (shown in Figure 6A,B). **B**, Fraction of bound RNA with  $K_d$  estimates. Hill coefficients were  $2.23 \pm 0.20$  (can) and  $1.84 \pm 0.21$  (cr).

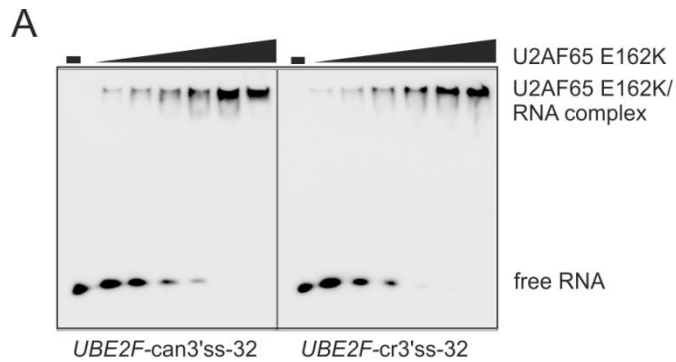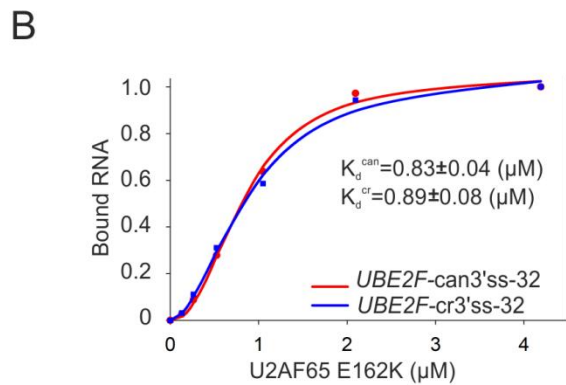

**Figure S5 Non-isotopic EMSA with WT and mutated PUF60 and RNA probes derived from competing 3'ss of *UBE2F* exon 5**

Substitutions are shown at the top, biotin-labelled RNA probes at the bottom. Their sequences are in Table 1. Concentration of recombinant proteins was 0.19, 0.58 and 1.76  $\mu$ M.

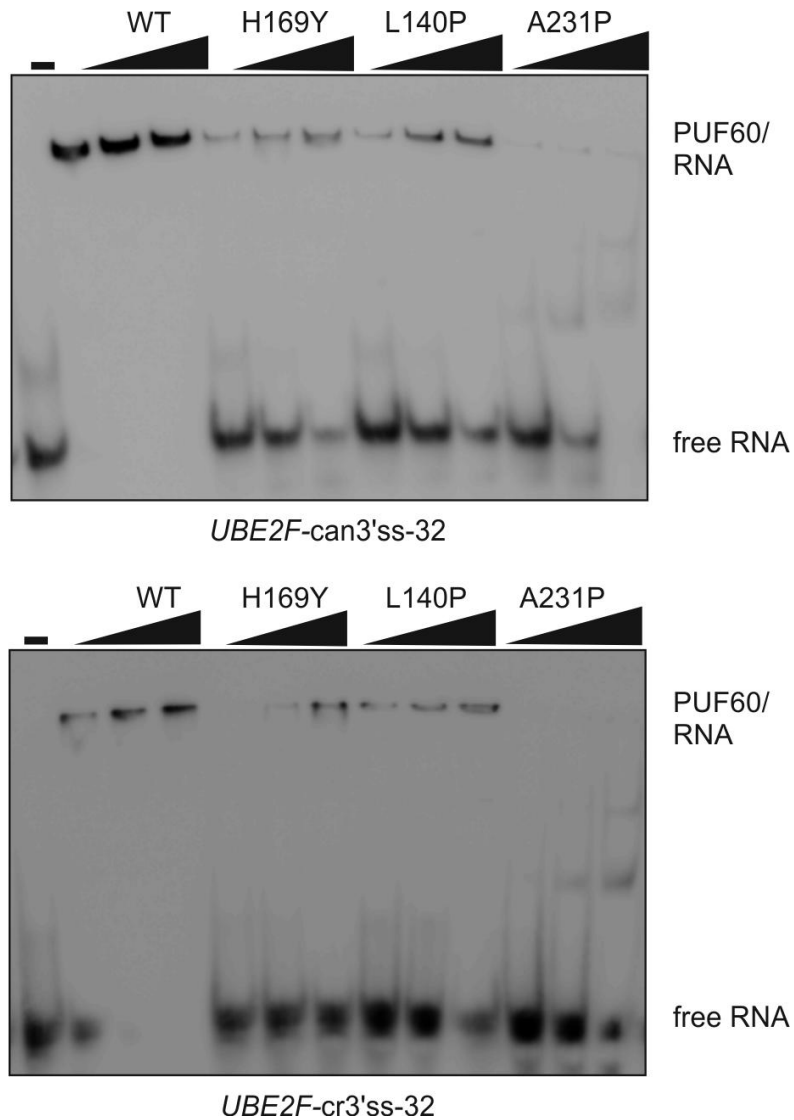

## Figure S6 Binding of PUF60 H169Y to *UBE2F*-derived oligoribonucleotides

**A**, EMSA with purified recombinant PUF60 H169Y and 32-mer RNAs derived from canonical (left panel) and cryptic (right) 3' ss. The amount of proteins and RNAs was the same as for the WT (shown in Figure 7B). **B**, Fraction of bound RNA with approximate  $K_d$  estimates (without saturation). The Hill coefficients were  $2.4 \pm 0.5$  (can) and  $6.4 \pm 2.5$  (cr).

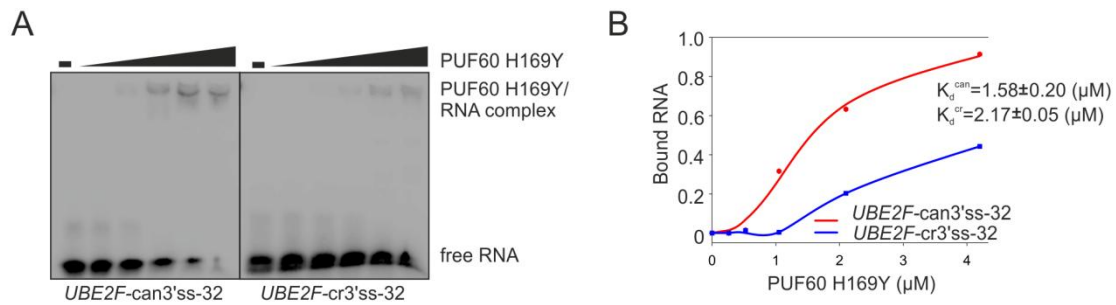

**Figure S7 PUF60 L140P and A231P induce protein destabilization and misfolding**

Coomassie-stained gel (upper panel) blotted with anti-His antibodies (lower panel) after overnight digestion of the indicated proteins with the TEV protease. The amount of each protein loaded on to the gel was 1.40, 0.46 and 0.14  $\mu\text{g}$ .

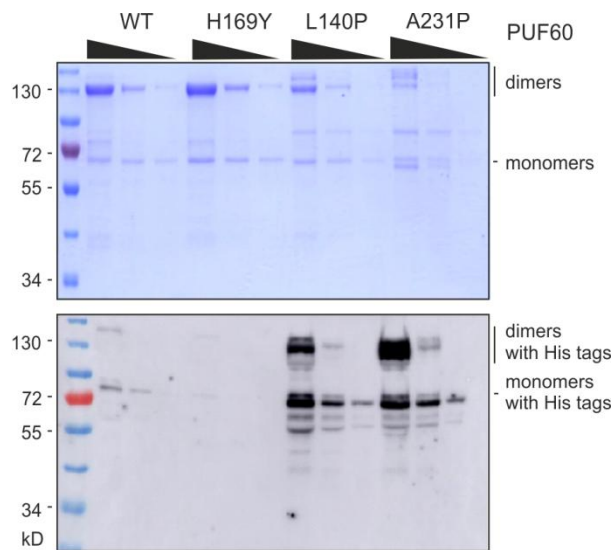

### Figure S8 Solubility and stability profiles of wild-type and mutated PUF60 or U2AF65

**A**, PUF60. **B**, U2AF65. Scores higher than 1 denote highly soluble regions whereas scores smaller than -1 denote poorly soluble regions, as predicted by CamSol (27). Blue/red arrows denote substitutions in regions with potential increased/reduced solubility. Changes in protein stability ( $\Delta\Delta G$ ) were predicted using a mutation cut-off scanning matrix (28).

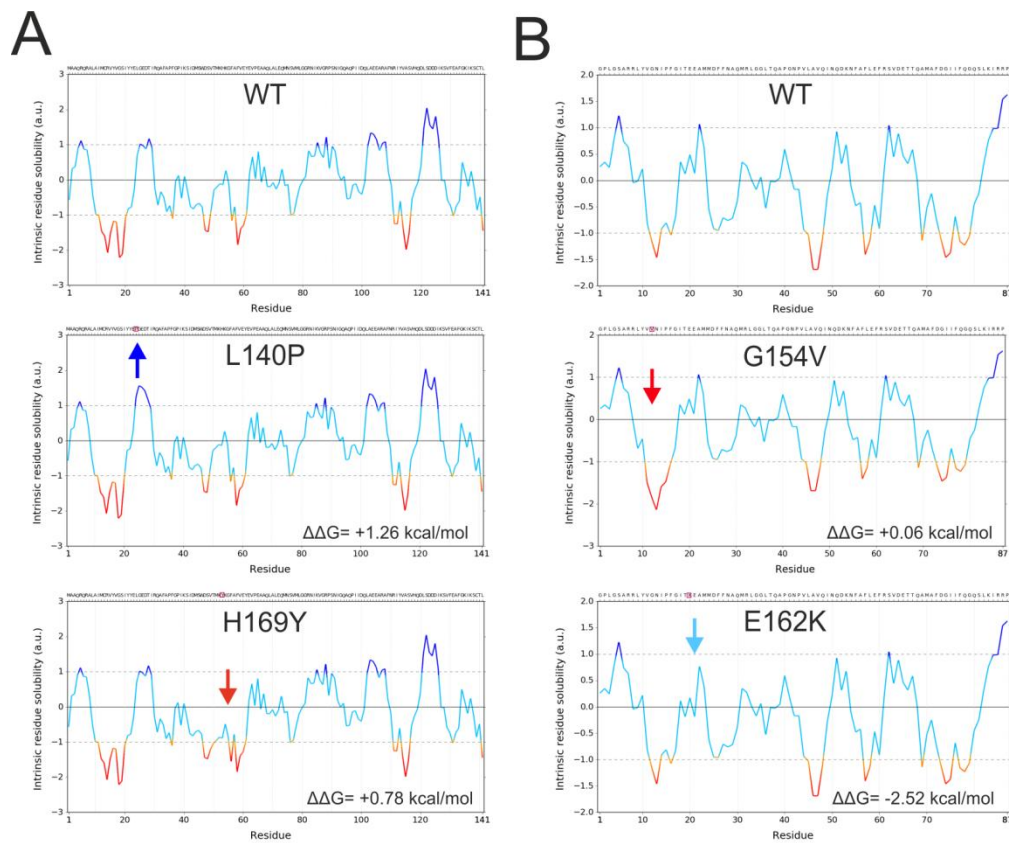



**Figure S9 H169Y in the crystal structure of PUF60 RRM1**

PDB: 5KW1 (Crichlow et al., unpublished). The protein is shown as cartoon in purple. H169Y and surrounding hydrophobic residues are shown in orange, nitrogen atoms in blue, and oxygen atoms in red. Dotted line denotes a hydrogen bond between H169 and L140.

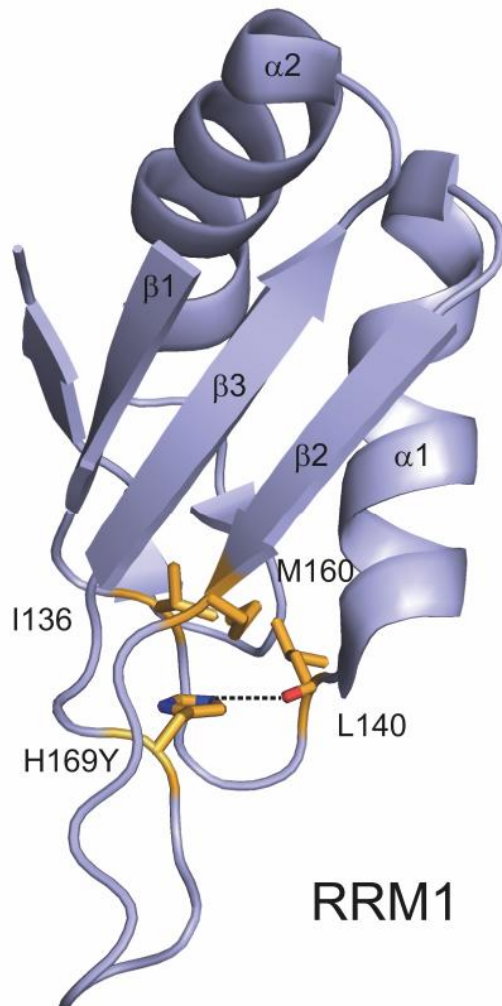

**Figure S10 Utilization of cryptic 3'ss of *UBE2F* exon 5 in human tissues**

**A**, Schematics of the *UBE2F* splicing pattern. Exons are shown as boxes, introns as lines, spliced products (shown to the right) as dotted lines. Arrows indicate locations of primers for amplifying canonical (in exon 4 and 6) and non-canonical (across cryptic 3'ss of exon 5 and in exon 6) products. Asterisk denotes a G>A mismatch between the primer and the first position of exon 4a (the sequence is in panel C). **B**, RT-PCR products amplified from cDNA samples prepared from human tissues and separated on agarose gels. Amplification primers (Table S2) are schematically shown at the bottom. The cryptic 3'ss of exon 5 could be visualized with primers in exons 4 and 6 only after >33 PCR cycles (not shown). MW, size marker (nt); NC, no target control. Minor species/heteroduplexes are denoted by asterisks. **C**, Sanger sequencing of the two non-canonical RNA products excised from panel B lanes identified to the left.

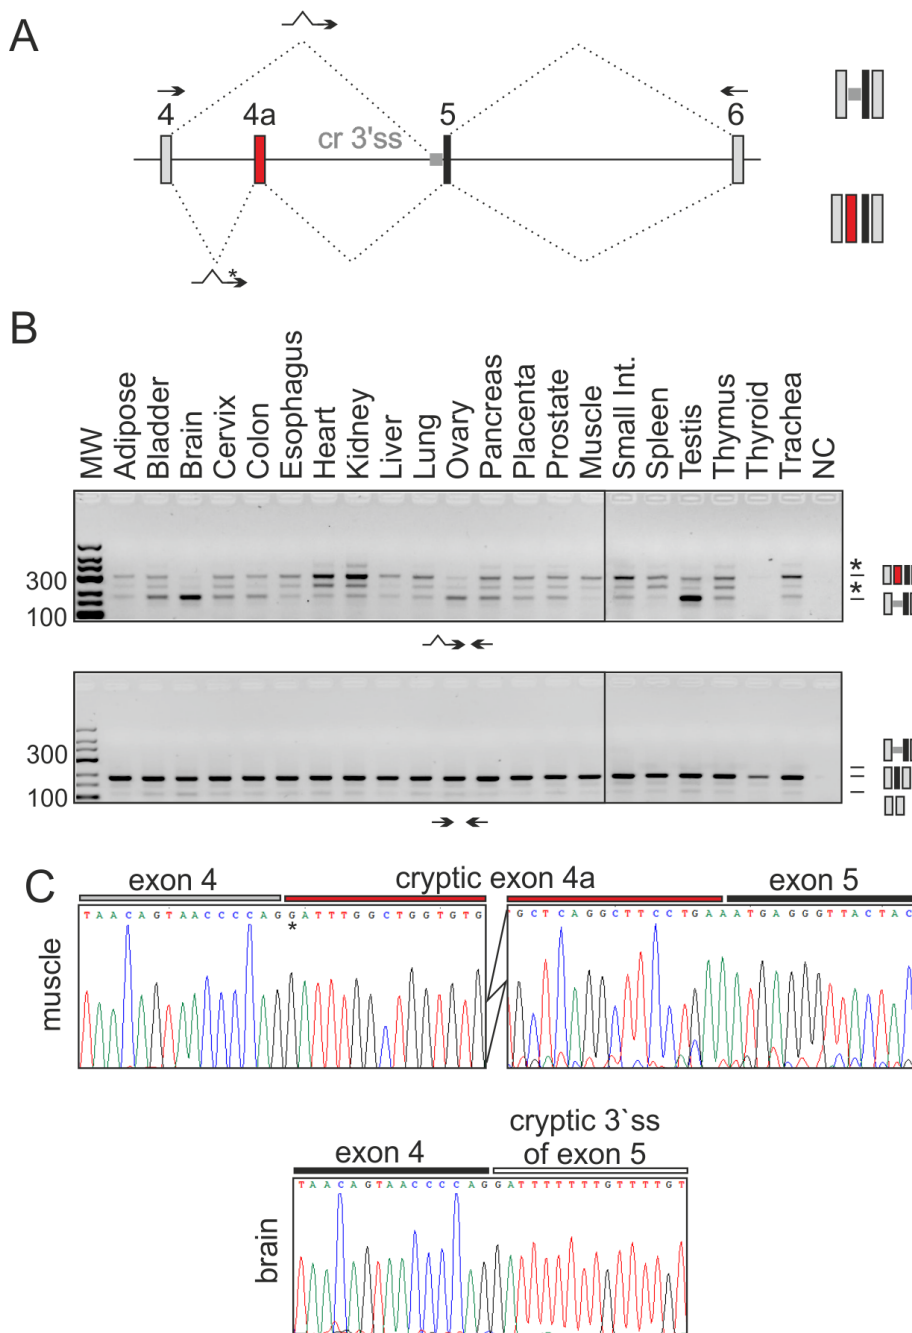

## References to Supplemental information

1. Giannakis, M., Hodis, E., Jasmine Mu, X., Yamauchi, M., Rosenbluh, J., Cibulskis, K., Saksena, G., Lawrence, M.S., Qian, Z.R., Nishihara, R. *et al.* (2014) RNF43 is frequently mutated in colorectal and endometrial cancers. *Nat. Genet.*, **46**, 1264-1266.
2. Ellis, M.J., Ding, L., Shen, D., Luo, J., Suman, V.J., Wallis, J.W., Van Tine, B.A., Hoog, J., Goiffon, R.J., Goldstein, T.C. *et al.* (2012) Whole-genome analysis informs breast cancer response to aromatase inhibition. *Nature*, **486**, 353-360.
3. Seshagiri, S., Stawiski, E.W., Durinck, S., Modrusan, Z., Storm, E.E., Conboy, C.B., Chaudhuri, S., Guan, Y., Janakiraman, V., Jaiswal, B.S. *et al.* (2012) Recurrent R-spondin fusions in colon cancer. *Nature*, **488**, 660-664.
4. Waterfall, J.J., Arons, E., Walker, R.L., Pineda, M., Roth, L., Killian, J.K., Abaan, O.D., Davis, S.R., Kreitman, R.J. and Meltzer, P.S. (2014) High prevalence of MAP2K1 mutations in variant and IGHV4-34-expressing hairy-cell leukemias. *Nat. Genet.*, **46**, 8-10.
5. Berger, M.F., Hodis, E., Heffernan, T.P., Deribe, Y.L., Lawrence, M.S., Protopopov, A., Ivanova, E., Watson, I.R., Nickerson, E., Ghosh, P. *et al.* (2012) Melanoma genome sequencing reveals frequent PREX2 mutations. *Nature*, **485**, 502-506.
6. Barbieri, C.E., Baca, S.C., Lawrence, M.S., Demichelis, F., Blattner, M., Theurillat, J.P., White, T.A., Stojanov, P., Van Allen, E., Stransky, N. *et al.* (2012) Exome sequencing identifies recurrent SPOP, FOXA1 and MED12 mutations in prostate cancer. *Nat. Genet.*, **44**, 685-689.
7. Kumar, A., Coleman, I., Morrissey, C., Zhang, X., True, L.D., Gulati, R., Etzioni, R., Bolouri, H., Montgomery, B., White, T. *et al.* (2016) Substantial interindividual and limited intraindividual genomic diversity among tumors from men with metastatic prostate cancer. *Nat. Med.*, **22**, 369-378.
8. Pickering, C.R., Zhou, J.H., Lee, J.J., Drummond, J.A., Peng, S.A., Saade, R.E., Tsai, K.Y., Curry, J.L., Tetzlaff, M.T., Lai, S.Y. *et al.* (2014) Mutational landscape of aggressive cutaneous squamous cell carcinoma. *Clin. Cancer Res.*, **20**, 6582-6592.
9. Giannakis, M., Mu, X.J., Shukla, S.A., Qian, Z.R., Cohen, O., Nishihara, R., Bahl, S., Cao, Y., Amin-Mansour, A., Yamauchi, M. *et al.* (2016) Genomic Correlates of Immune-Cell Infiltrates in Colorectal Carcinoma. *Cell Rep.*, **17**, 1206.
10. Papaemmanuil, E., Gerstung, M., Malcovati, L., Tauro, S., Gundem, G., Van Loo, P., Yoon, C.J., Ellis, P., Wedge, D.C., Pellagatti, A. *et al.* (2013) Clinical and biological implications of driver mutations in myelodysplastic syndromes. *Blood*, **122**, 3616-3627.
11. Papaemmanuil, E., Gerstung, M., Bullinger, L., Gaidzik, V.I., Paschka, P., Roberts, N.D., Potter, N.E., Heuser, M., Thol, F., Bolli, N. *et al.* (2016) Genomic Classification and Prognosis in Acute Myeloid Leukemia. *N. Engl. J. Med.*, **374**, 2209-2221.
12. Guo, G., Sun, X., Chen, C., Wu, S., Huang, P., Li, Z., Dean, M., Huang, Y., Jia, W., Zhou, Q. *et al.* (2013) Whole-genome and whole-exome sequencing of bladder cancer identifies frequent alterations in genes involved in sister chromatid cohesion and segregation. *Nat. Genet.*, **45**, 1459-1463.
13. Nik-Zainal, S., Davies, H., Staaf, J., Ramakrishna, M., Glodzik, D., Zou, X., Martincorena, I., Alexandrov, L.B., Martin, S., Wedge, D.C. *et al.* (2016) Landscape of somatic mutations in 560 breast cancer whole-genome sequences. *Nature*, **534**, 47-54.
14. Quesada, V., Conde, L., Villamor, N., Ordóñez, G.R., Jares, P., Bassaganyas, L., Ramsay, A.J., Bea, S., Pinyol, M., Martínez-Trillos, A. *et al.* (2012) Exome sequencing identifies recurrent mutations of the splicing factor SF3B1 gene in chronic lymphocytic leukemia. *Nat. Genet.*, **44**, 47-52.
15. Kataoka, K., Nagata, Y., Kitanaka, A., Shiraishi, Y., Shimamura, T., Yasunaga, J., Totoki, Y., Chiba, K., Sato-Otsubo, A., Nagae, G. *et al.* (2015) Integrated molecular analysis of adult T cell leukemia/lymphoma. *Nat. Genet.*, **47**, 1304-1315.
16. Abaan, O.D., Polley, E.C., Davis, S.R., Zhu, Y.J., Bilke, S., Walker, R.L., Pineda, M., Gindin, Y., Jiang, Y., Reinhold, W.C. *et al.* (2013) The exomes of the NCI-60 panel: a genomic resource for cancer biology and systems pharmacology. *Cancer Res.*, **73**, 4372-4382.

17. Cancer Genome Atlas, N. (2012) Comprehensive molecular characterization of human colon and rectal cancer. *Nature*, **487**, 330-337.
18. Dutton-Regester, K., Kakavand, H., Aoude, L.G., Stark, M.S., Gartside, M.G., Johansson, P., O'Connor, L., Lanagan, C., Tembe, V., Pupo, G.M. *et al.* (2013) Melanomas of unknown primary have a mutation profile consistent with cutaneous sun-exposed melanoma. *Pigment Cell Melanoma Res.*, **26**, 852-860.
19. Van Allen, E.M., Wagle, N., Sucker, A., Treacy, D.J., Johannessen, C.M., Goetz, E.M., Place, C.S., Taylor-Weiner, A., Whittaker, S., Kryukov, G.V. *et al.* (2014) The genetic landscape of clinical resistance to RAF inhibition in metastatic melanoma. *Cancer Discov.*, **4**, 94-109.
20. Hayes, T.F., Benaich, N., Goldie, S.J., Sipila, K., Ames-Draycott, A., Cai, W., Yin, G. and Watt, F.M. (2016) Integrative genomic and functional analysis of human oral squamous cell carcinoma cell lines reveals synergistic effects of FAT1 and CASP8 inactivation. *Cancer Lett.*, **383**, 106-114.
21. Imielinski, M., Berger, A.H., Hammerman, P.S., Hernandez, B., Pugh, T.J., Hodis, E., Cho, J., Suh, J., Capelletti, M., Sivachenko, A. *et al.* (2012) Mapping the hallmarks of lung adenocarcinoma with massively parallel sequencing. *Cell*, **150**, 1107-1120.
22. Dauber, A., Golzio, C., Guenot, C., Jodelka, F.M., Kibaek, M., Kjaergaard, S., Leheup, B., Martinet, D., Nowaczyk, M.J., Rosenfeld, J.A. *et al.* (2013) SCRIB and PUF60 are primary drivers of the multisystemic phenotypes of the 8q24.3 copy-number variant. *Am. J. Hum. Genet.*, **93**, 798-811.
23. Forbes, S.A., Beare, D., Boutselakis, H., Bamford, S., Bindal, N., Tate, J., Cole, C.G., Ward, S., Dawson, E., Ponting, L. *et al.* (2017) COSMIC: somatic cancer genetics at high-resolution. *Nucleic Acids Res.*, **45**, D777-D783.
24. Agrawal, A.A., McLaughlin, K.J., Jenkins, J.L. and Kielkopf, C.L. (2014) Structure-guided U2AF65 variant improves recognition and splicing of a defective pre-mRNA. *Proc. Natl. Acad. Sci. USA*, **111**, 17420-17425.
25. Low, K.J., Ansari, M., Abou Jamra, R., Clarke, A., El Chehadeh, S., FitzPatrick, D.R., Greenslade, M., Henderson, A., Hurst, J., Keller, K. *et al.* (2017) PUF60 variants cause a syndrome of ID, short stature, microcephaly, coloboma, craniofacial, cardiac, renal and spinal features. *Eur. J. Hum. Genet.*, **25**, 552-559.
26. Sickmier, E.A., Frato, K.E., Shen, H., Paranawithana, S.R., Green, M.R. and Kielkopf, C.L. (2006) Structural Basis for Polypyrimidine Tract Recognition by the Essential Pre-mRNA Splicing Factor U2AF65. *Mol. Cell*, **23**, 49-59.
27. Sormanni, P., Aprile, F.A. and Vendruscolo, M. (2015) The CamSol method of rational design of protein mutants with enhanced solubility. *J. Mol. Biol.*, **427**, 478-490.
28. Pires, D.E., Ascher, D.B. and Blundell, T.L. (2014) mCSM: predicting the effects of mutations in proteins using graph-based signatures. *Bioinformatics*, **30**, 335-342.
